# Supplementary material for: Insight into molecular interactions of Aβ peptide and gelatinase from Enterococcus faecalis: a molecular modeling approach
Source: Royal Society of Chemistry journal article supplement (doi:10.1039/c4ra09354b), 2015-01-01
Supplement: c4ra09354b1.pdf [file c4ra09354b1.pdf]

(a)

10 20 30 40 50 60 70  
| | | | | | |  
MKG N K I L Y I L G T G I F V G S S C L F S S L F V A A E E Q V Y S E S E V S T V L S K L E K E A I S E A A A E Q Y T V V D R K E D A W G  
c t t c e e e e e e t c c e e e c c h h h h h h h h h h h h h h h h c c h h h h h h h h h h h h h h h h h h h e e e e e c c c t t t  
M K H L K L E K Q T E G V T V D S D N V I I H L D K N G A V T S V T G N P V D Q V V K I Q S V D A I G E E G V K K I I A S D N P E N K D L V  
c e e e e e c c c t t c c c c c e e e e e e c t t c c e e e e h c c c c c c c c h h h h h h h h h h h h h h h h c c c c c c c c c c c  
F L A I D K R V N N E G Q L F Y K V R V T S S P T G D P V S L V Y K V N A T D G T I M E K Q D L T E H V G S E V T L K N S F Q V T F N V P V  
c e e e e e e c t t c e e e e e e e e e e e e e e e e e e e e t t c c e e e h h h h h h h h h c c c c e e c c c c c e e c c c c  
E K S N T G I A L H G T D N T G V Y H A V V D G K N N Y S I I Q A P S L A T L N Q N A V D A Y T H G K F V K T Y Y E D H F Q R H S I D D R G  
c c c c e e e e c c c c c c c c c c e e e e e e e c c c c c c c c c e e e e c c h h h h h h h h h h h h h h h h c c c c c c t t t  
M P I L S V V D E Q H P D A Y D N A F W D G K A M R Y G E T S T P T G K T Y A S S L D V V G H E M T H G V T E H T A G L E Y L G Q S G A L N  
c e e e e e e e c c c c c c h h e e t t c e e e e c c c c c e e c c c c h h h h h h h h h h h h h h h h h c c c e e e e c c c t t c h h  
E S Y S D L M G Y I I S G A S N P E I G A D T Q S V D R K T G I R N L Q T P S K H G Q P E T M A Q Y D D R A R Y K G T P Y Y D Q G G V H Y N  
h h h h h h h h h h h h c c c e e c c e e e e c c c c c c c c h h h h c c c c c c c c c c c c h h c c c c c c c c c c c c e e e c  
S G I I N R I G Y T I I Q N L G I E K A Q T I F Y S S L V N Y L T P K A Q F S D A R D A M L A A A K V Q Y G D E A A S V V S A A F N S A G I  
t t c c c h h e e e e e t t c c c c c h h h h h h h h h h e e c c c c c c h h h h h h h h h h h h h h c c c c c h h h h h h h h h t t c  
G A K E D I Q V N Q P S E S V L V N E  
C c c c e e e c c c c c e e e e h

Sequence length: 509

SOPMA:

|                 |      |   |     |    |        |
|-----------------|------|---|-----|----|--------|
| Alpha helix     | (Hh) | : | 162 | is | 31.83% |
| Extended strand | (Ee) | : | 110 | is | 21.61% |
| Beta turn       | (Tt) | : | 27  | is | 5.30%  |
| Random coil     | (Cc) | : | 210 | is | 41.26% |

(b)

10 20 30 40 50 60 70  
| | | | | | |  
MKG N K I L Y I L G T G I F V G S S C L F S S L F V A A E E Q V Y S E S E V S T V L S K L E K E A I S E A A A E Q Y T V V D R K E D A W G  
c c c c e e e e e e e e c c c c e e c c c c c c c c h h h h h h h h h h c c c c c h h h h h h h h h h h h h h h h h h h h h h h h h h h h h h h h h h h h h h  
M K H L K L E K Q T E G V T V D S D N V I I H L D K N G A V T S V T G N P V D Q V V K I Q S V D A I G E E G V K K I I A S D N P E N K D L V  
h h h h h h c c c c c e e e e e e e e e e e e e e e e e e e e e e e e e e e e e e e h h h h h h h c e e e e e e e e e e c c c h h h  
F L A I D K R V N N E G Q L F Y K V R V T S S P T G D P V S L V Y K V N A T D G T I M E K Q D L T E H V G S E V T L K N S F Q V T F N V P V  
h h h h h h h c c c c c e e e e e e e e e e e e e e e e e e e e e e e c c c c c h h h h h h c c c c c c e e e e e e e e e e e e e c c  
E K S N T G I A L H G T D N T G V Y H A V V D G K N N Y S I I Q A P S L A T L N Q N A V D A Y T H G K F V K T Y Y E D H F Q R H S I D D R G  
c c c e e e e e e e c c c c e e e e e e e e e e e e e e e e c c c h h h h h h c h h h h h h c c c e e e e e e e e e e e e e e c c c c c c  
M P I L S V V D E Q H P D A Y D N A F W D G K A M R Y G E T S T P T G K T Y A S S L D V V G H E M T H G V T E H T A G L E Y L G Q S G A L N  
c e e e e e e c c c c e e e e e e e e e e e e e e e e e e e e e e e e e e e e e e c c h h h h h h h c c c c c c c c c c c c c c c c  
E S Y S D L M G Y I I S G A S N P E I G A D T Q S V D R K T G I R N L Q T P S K H G Q P E T M A Q Y D D R A R Y K G T P Y Y D Q G G V H Y N  
h h h h h h h e e e e e c c c c c c c c c c c c c c h h h h c e e e e e e e e e e e e c c c c c c h h h h h h h h h c c c c e e e e c c c c c c c c  
S G I I N R I G Y T I I Q N L G I E K A Q T I F Y S S L V N Y L T P K A Q F S D A R D A M L A A A K V Q Y G D E A A S V V S A A F N S A G I  
c c c e e e c c h h h h h h c c h h h h h h h h h h h h h h c c c c c h h h h h h h h h h h h h h h h h h h h h h c c h h h h h h h h h h h h h h c c c  
G A K E D I Q V N Q P S E S V L V N E  
C c c c h h h h c c c c c e e e e c

Sequence length: 509

GOR4:

|                 |      |   |     |    |        |
|-----------------|------|---|-----|----|--------|
| Alpha helix     | (Hh) | : | 158 | is | 31.04% |
| Extended strand | (Ee) | : | 119 | is | 23.38% |
| Random coil     | (Cc) | : | 232 | is | 45.58% |

**Figure S1** Secondary structure prediction by (a) SOPMA and (b) GOR4 programme.

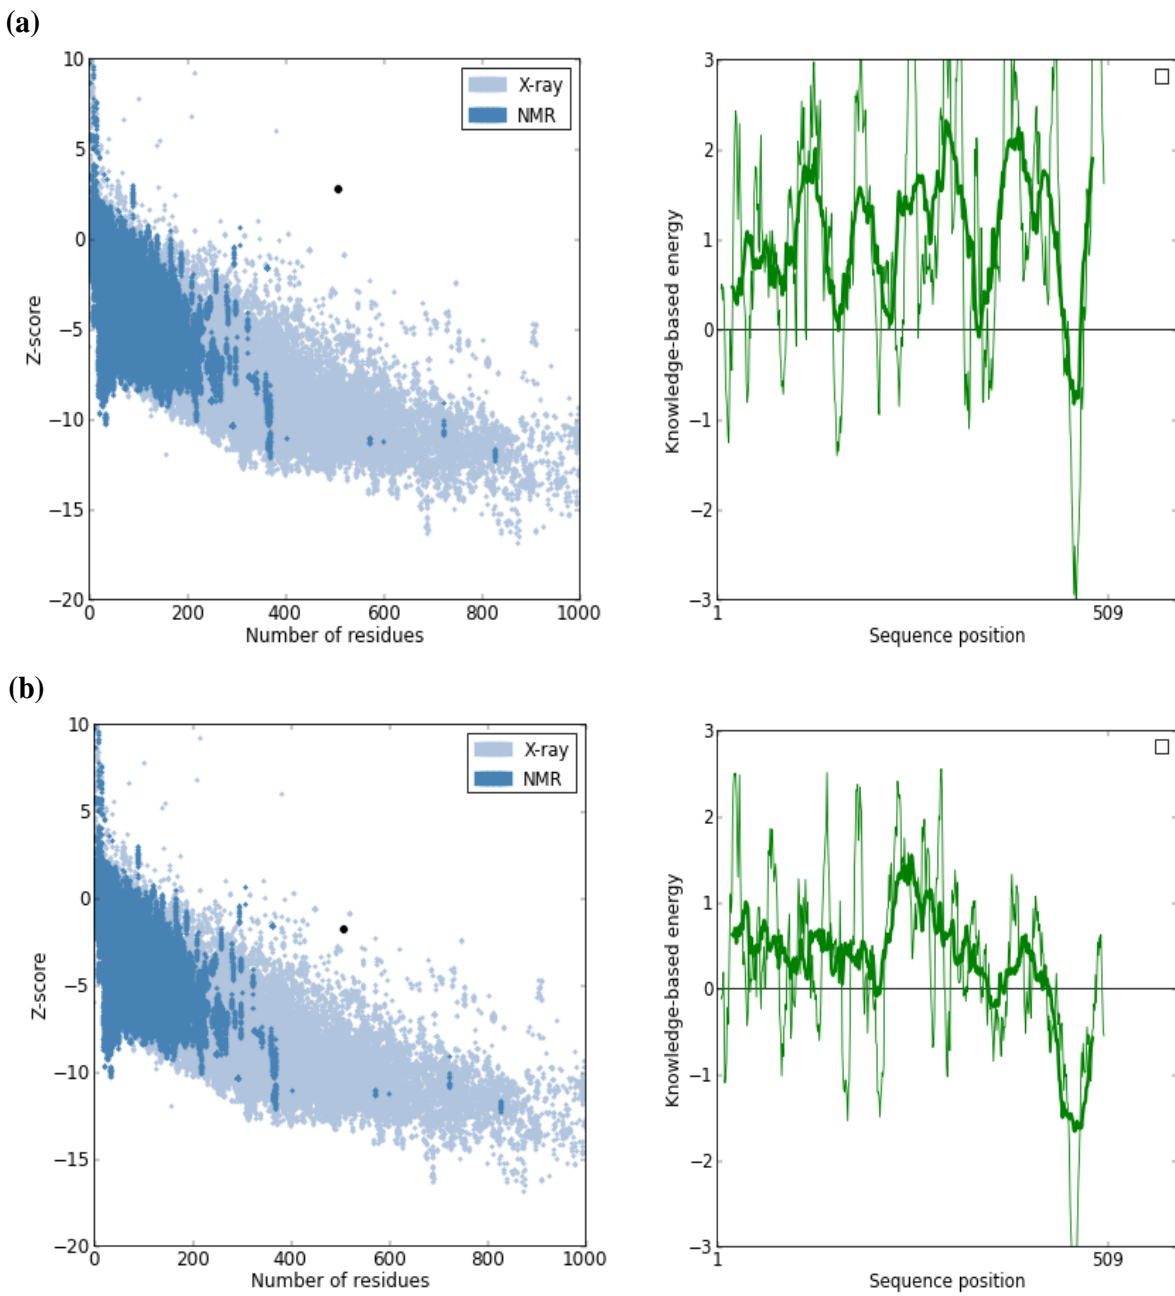

**Figure S2** ProSA-web Z-scores of models (a) MUSTER and (b) MODELLER indicated by black dot and residue energies averaged over a sliding window.

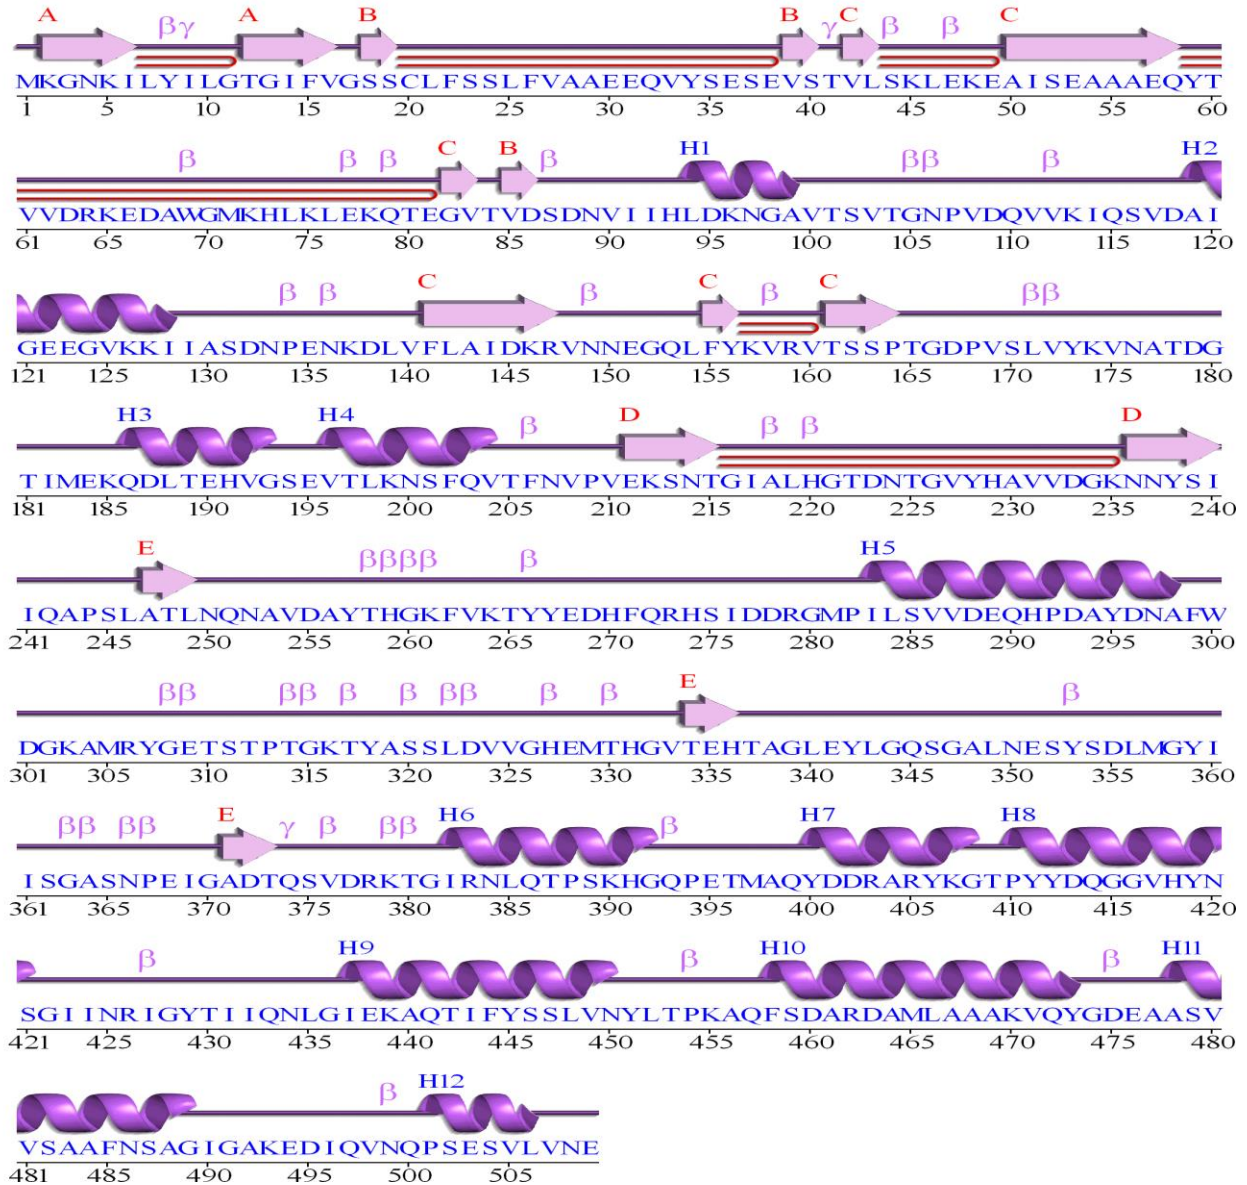

**Figure S3** Structural details of predicted model of gelatinase from *Enterococcus faecalis* obtained by PDBsum. Helices are labeled with letter H followed by number (blue), strands with A, B (red), β and γ represents beta and gamma turn respectively.
